# Supplementary material for: Effects of TGF-beta signalling inhibition with galunisertib (LY2157299) in hepatocellular carcinoma models and in ex vivo whole tumor tissue samples from patients
Source: PubMed Central journal article supplement (PMC4673290; doi:10.18632/oncotarget.4308), 2015-05-27
Supplement: oncotarget-06-21614-s001.pdf [file oncotarget-06-21614-s001.pdf]

# Effects of TGF-beta signalling inhibition with galunisertib (LY2157299) in hepatocellular carcinoma models and in *ex vivo* whole tumor tissue samples from patients

Supplementary Material

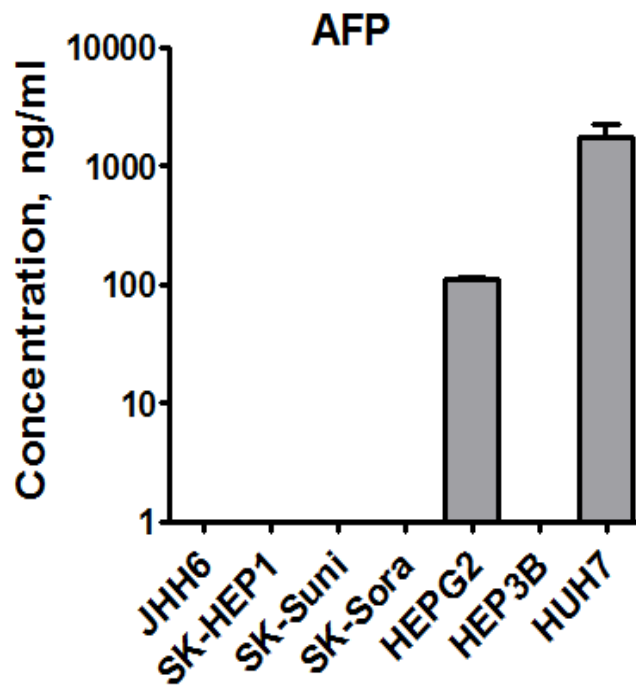

Supplementary Figure 1: Concentration of AFP in conditioned medium of HCC cells

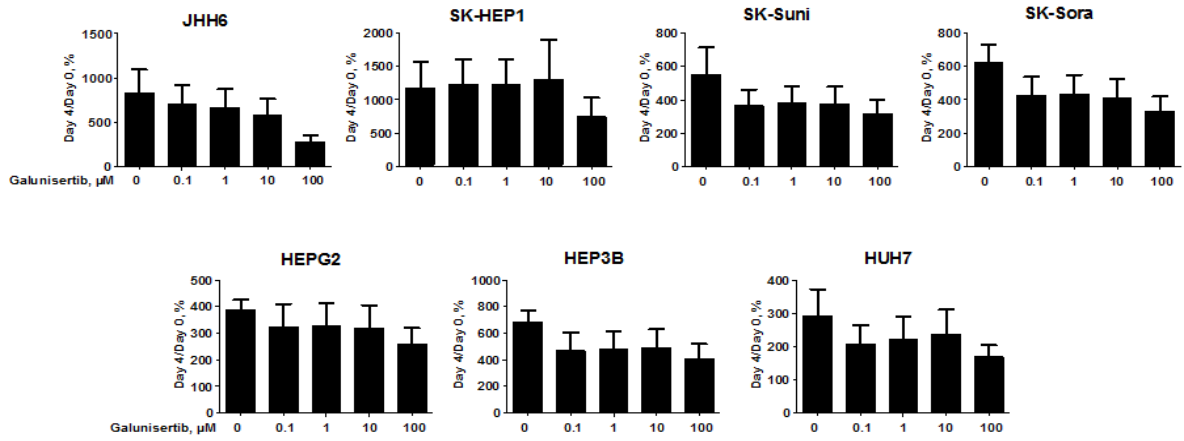

Supplementary Figure 2: Antiproliferative effects of galunisertib without TGF- $\beta$  on a panel of HCC cell lines.

| Patient ID | Proliferation (%) |       |        | Apoptosis (%) |       |        | pSMAD (%)    |       |        | pAKT (%)     |       |        | pERK (%)     |       |        |
|------------|-------------------|-------|--------|---------------|-------|--------|--------------|-------|--------|--------------|-------|--------|--------------|-------|--------|
|            | Galunisertib      | Sora  | G+Sora | Galunisertib  | Sora  | G+Sora | Galunisertib | Sora  | G+Sora | Galunisertib | Sora  | G+Sora | Galunisertib | Sora  | G+Sora |
| 570725     | -98,3             | -89,6 | -      | -53,7         | 800,2 | -      | -93,1        | 0,7   | -      | -74,9        | -84,0 | -      | -28,2        | -73,2 | -      |
| 570790     | -97,9             | -89,8 | -      | 1850,7        | 543,7 | -      | -74,3        | -17,8 | -      | -            | -     | -      | -            | -     | -      |
| 590914     | -99,4             | -78,4 | -      | 3165,7        | 7625  | -      | -87,0        | -11,0 | -      | -78,9        | -84,6 | -      | -26,7        | -97,3 | -      |
| 3570       | 54,5              | 111,9 | -      | 110,3         | 55,2  | -      | -            | -     | -      | -            | -     | -      | -            | -     | -      |
| 3033       | -30,9             | -33,1 | -55,8  | 13,4          | 4,1   | 46,7   | -64,4        | -8,6  | -89,6  | -59,7        | -57,7 | -81,2  | -62,2        | -77,9 | -86,0  |
| 8590       | 9,9               | -27,6 | -65,6  | 0,8           | 145,0 | 200,9  | -39,7        | 63,0  | -87,3  | 9,3          | -39,5 | -80,6  | -19,4        | -59,0 | -90,6  |
| 8321       | -30,7             | -28,7 | -40,8  | 57,9          | 130,8 | 220,2  | -75,3        | -40,6 | -91,8  | -8,7         | -53,2 | -80,7  | -38,3        | -90,4 | -71,4  |
| 5659       | 4,3               | -48,9 | -41,7  | 42,7          | -6,2  | -3,8   | -78,5        | -13,1 | -95,9  | -22,4        | -73,3 | -93,6  | -16,6        | -60,5 | -79,6  |
| 5916       | -10,0             | -28,1 | -60,3  | 74,0          | 322,6 | 187,7  | -44,7        | -16,2 | -83,3  | -48,0        | -25,5 | -75,6  | -57,9        | -35,5 | -86,5  |
| 9951       | -10,4             | -13,9 | 7,6    | 14,2          | -40,0 | -37,7  | -66,7        | -13,6 | -91,5  | -12,4        | -21,2 | -67,0  | -68,8        | -53,0 | -63,3  |
| 9161       | -30,9             | -34,7 | -27,6  | 69,5          | 100,8 | 93,3   | -51,1        | -4,8  | -89,5  | -45,8        | -50,3 | -87,5  | -36,0        | -63,4 | -90,7  |
| 9160       | 56,8              | -37,5 | 15,1   | -13,3         | -29,9 | -84,4  | -63,0        | 0,3   | -86,5  | -36,8        | -43,9 | -68,8  | -21,1        | -48,9 | -74,5  |
| 9472       | -36,4             | -8,3  | -19,2  | -39,3         | 11,2  | -37,2  | -72,3        | -13,2 | -77,9  | -33,5        | -51,8 | -90,1  | -17,8        | -16,0 | -77,9  |

Supplementary Table 1. Relative levels of Ki67/Mib1, caspase-3, p-SMAD2/3, p-AKT, and p-ERK1/2 in patient samples treated *ex vivo* with galunisertib (G), sorafenib (Sora), or a combination of both treatments (G+Sora).

Percentages represent the protein expression relative to control after 48 hours of culture.
